# Supplementary material for: Automated trichome counting in soybean using advanced image‐processing techniques
Source: PubMed Central journal article supplement (PMC7394713; doi:10.1002/aps3.11375), 2020-07-28

**APPENDIX S1.** Leaf surface phenotypes of the 10 soybean (*Glycine max*) isolines used in this study. Images taken at growth stage V2, i.e., plants with two sets of unfolded trifoliolate leaves. Scale bar = 1 mm.

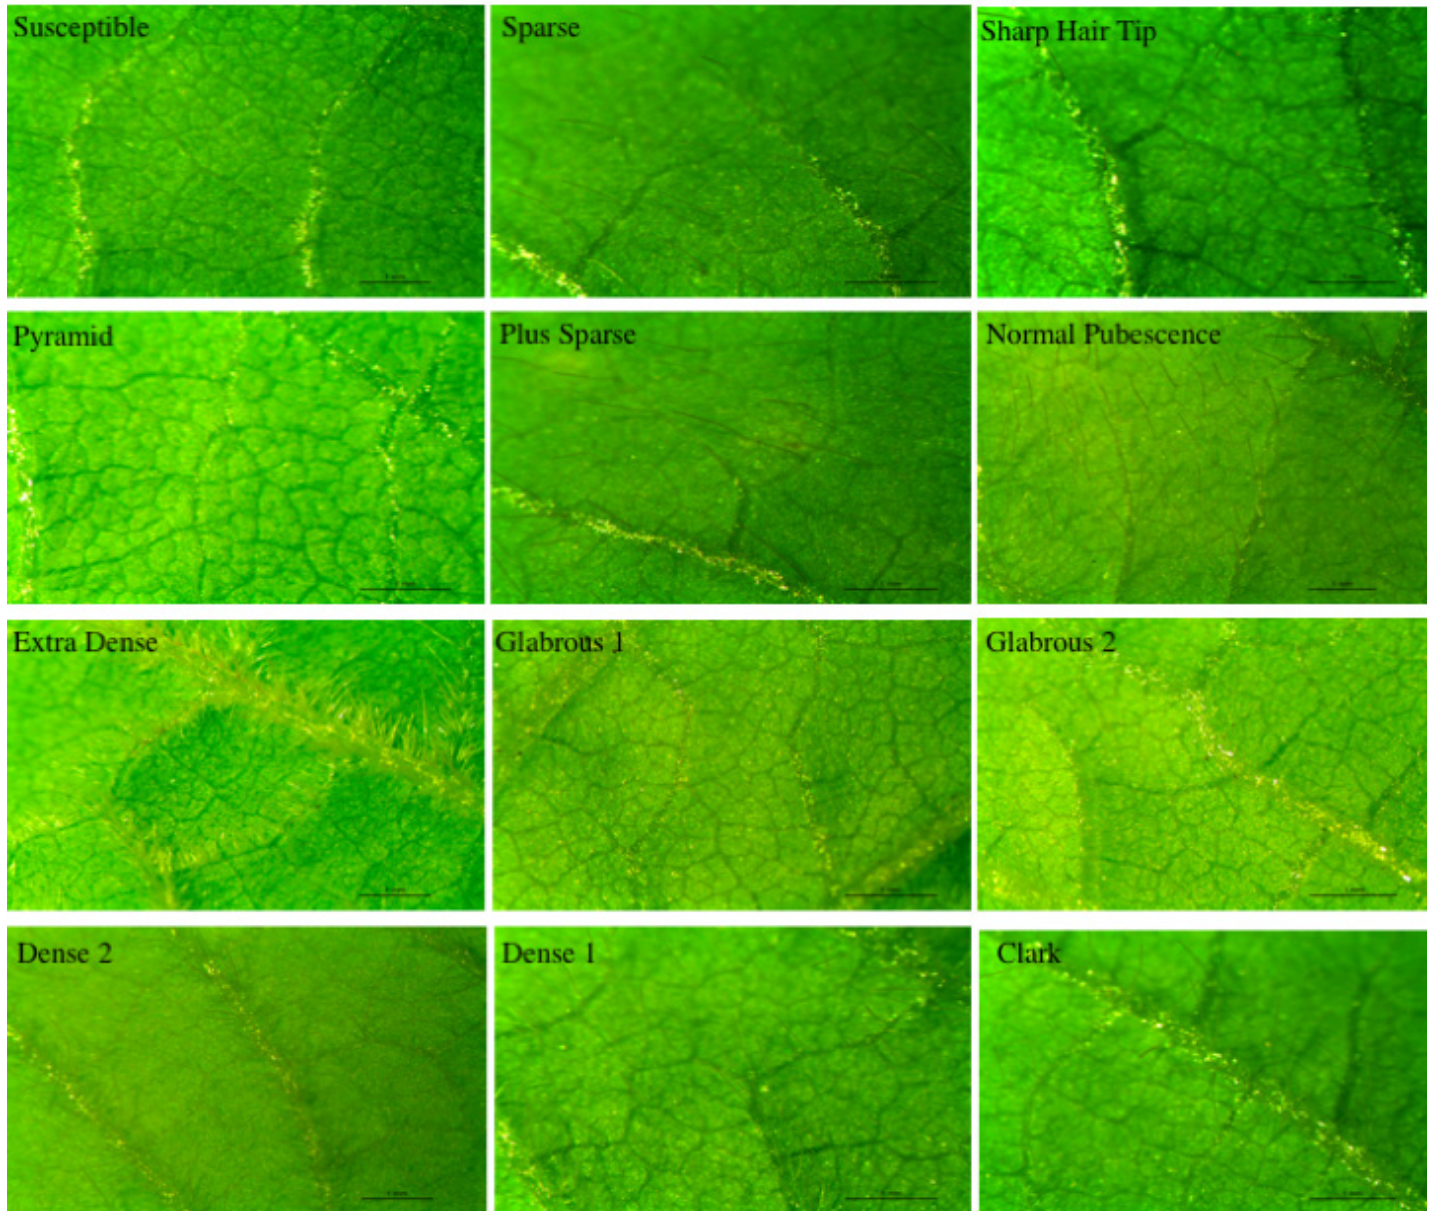

Supplement: APS3-8-e11375-s001.pdf [file APS3-8-e11375-s001.pdf]
