# Supplementary material for: Automated trichome counting in soybean using advanced image‐processing techniques
Source: PubMed Central journal article supplement (PMC7394713; doi:10.1002/aps3.11375), 2020-07-28
Supplement: APS3-8-e11375-s002.pdf [file APS3-8-e11375-s002.pdf]

**APPENDIX S2.** The three different views of imaging for a single soybean genotype. Side view images were used to count the number of trichomes. For the adaxial and abaxial views, it was very difficult to separate out individual trichomes due to the significant occlusion and merging.

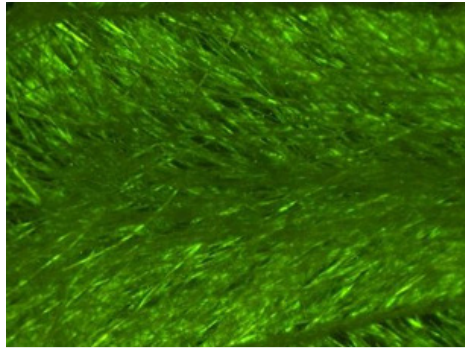

Adaxial view

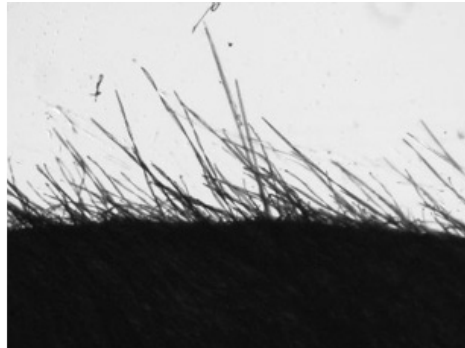

Side view

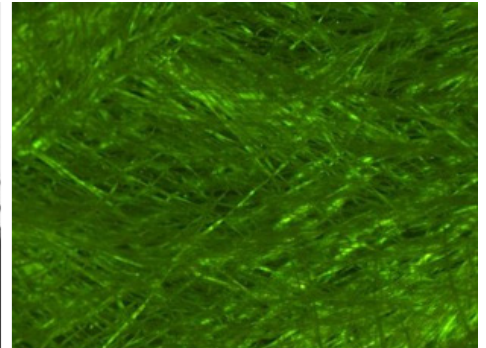

Abaxial view
