# Supplementary material for: Automated trichome counting in soybean using advanced image‐processing techniques
Source: PubMed Central journal article supplement (PMC7394713; doi:10.1002/aps3.11375), 2020-07-28
Supplement: APS3-8-e11375-s003.pdf [file APS3-8-e11375-s003.pdf]

**APPENDIX S3.** Observed trichome density variation in the 10 isogenic soybean lines analyzed.

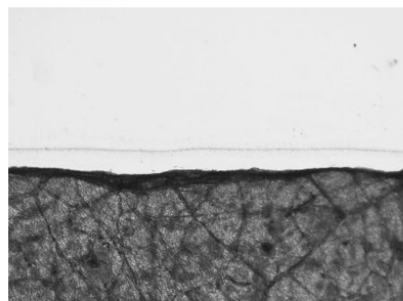

PI 547410

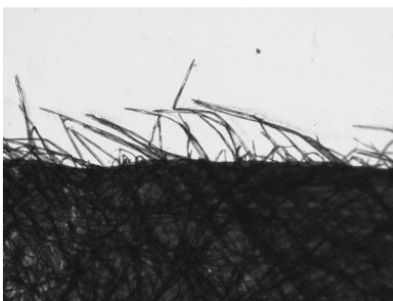

PI 547412

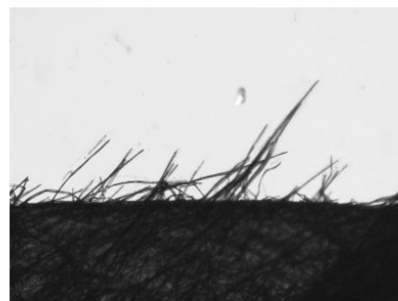

PI 547415

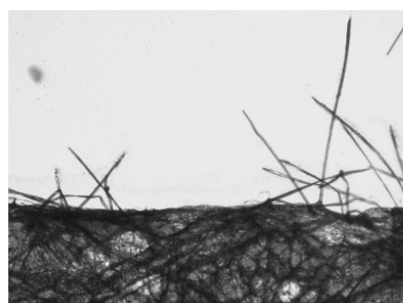

PI 547422

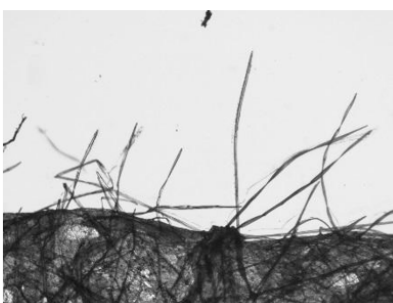

PI 547532

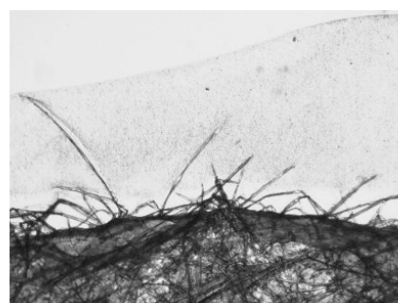

PI 547576

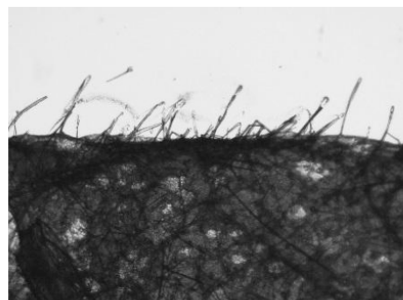

PI 547625

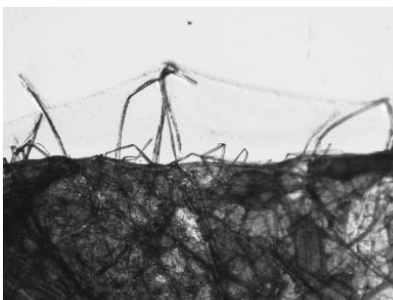

PI 547643

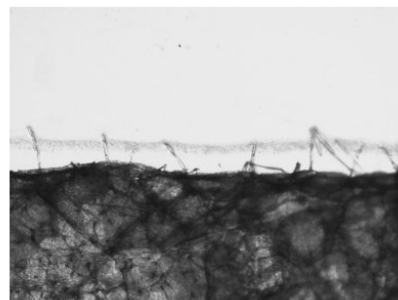

PI 547649

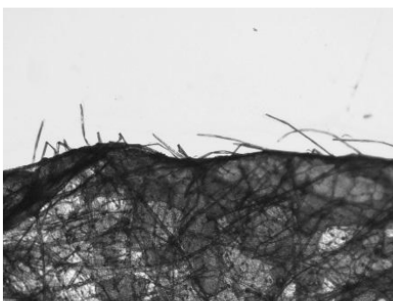

PI 548533
